# Supplementary material for: Function Is More Reliable Than Quantity to Follow Up the Humoral Response to the Receptor-Binding Domain of SARS-CoV-2-Spike Protein after Natural Infection or COVID-19 Vaccination
Source: MDPI journal article supplement (doi:10.3390/v13101972), 2021-09-30
Supplement: s1 [file s1]

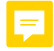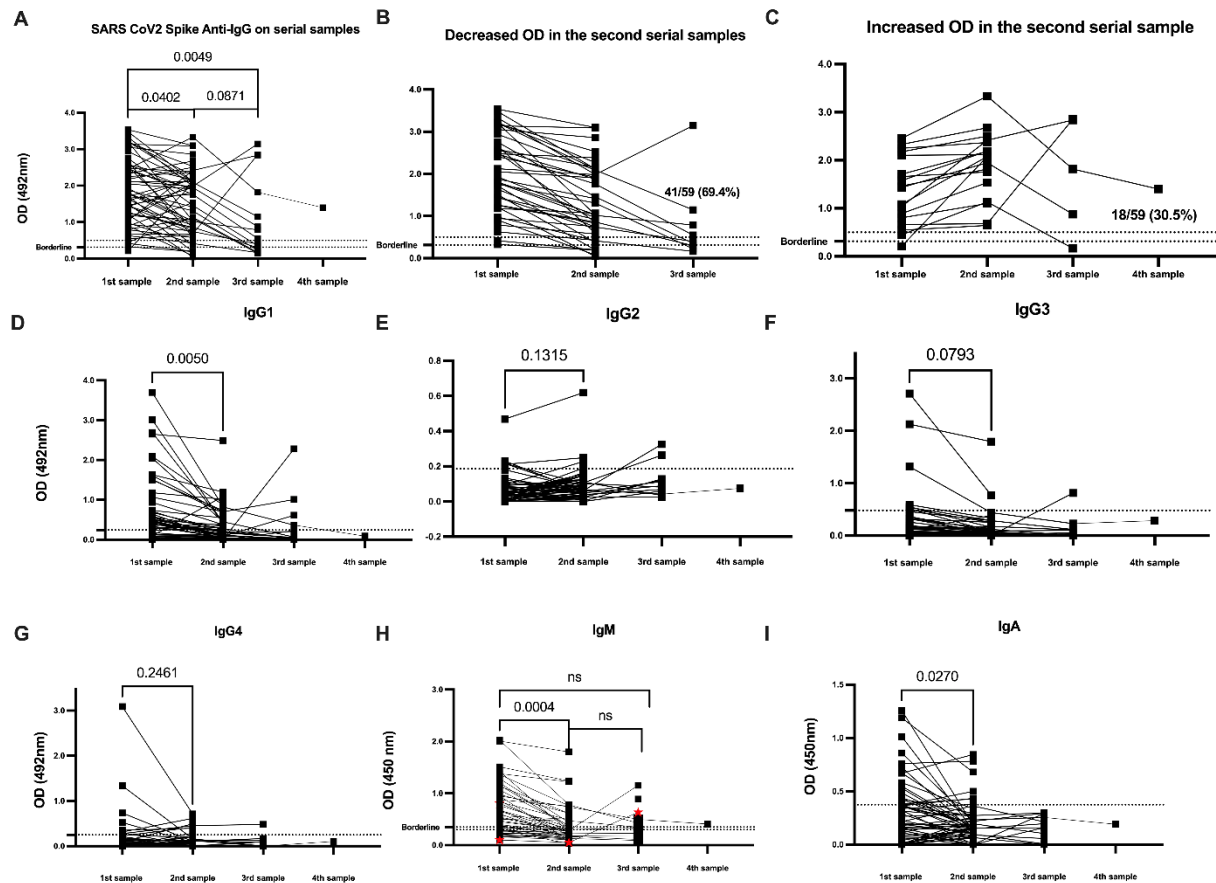

Supplementary figure 1

**Supplementary Figure S1: Antibody subclasses isotypes in a longitudinal cohort of 59 volunteers exposed to SARS-CoV-2.** Panel A shows the total anti-S antibodies in the second set of samples collected an average of 67.8 days after the first set of samples (an average of 108 days after PCR-confirmed SARS-CoV-2 infection). A third sample was collected from a subset of the participants (n=12) an average of 99.5 days after the second set of samples (an average of 207 days after infection). Two different patterns in the kinetics of the antibody response were identified: (1) 74.5% of samples showed a decrease in the binding from the time of the first to the second sampling (Panel B) and (2) 25.4% of samples showed increased values relative to the first sampling (Panel C). Panels D-G show the results of antibody binding for the different subclasses tested, with IgG1 being the predominant subclass. Panels H and I show the results for IgM and IgA isotypes. Statistical significance was determined by One-way ANOVA multiple comparisons test and unpaired T test to test for increase or decrease among samples.  $p < 0.05$  was considered significant. Sample 3 encompasses the 15 subjects from whom a collection of a third sample was completed. Panels D to I, includes the number of samples, from the initial cohort of 59 subjects before vaccination, that were positive for each of the antibody's subtype or subclasses as described in the results section.

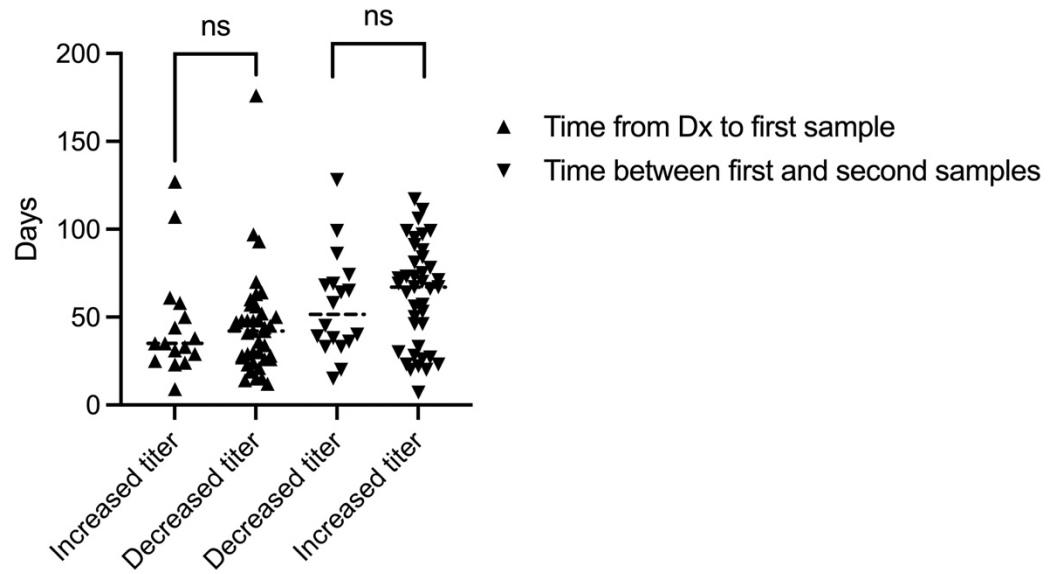

**Supplementary figure 2**

**Supplementary Figure S2: Time elapsed between diagnosis and sample collection was not significantly different between groups.** There were no significant differences in the time from diagnostic (Dx) to the first sample collection or between the first and the second samples collection in both groups. Statistical significance was determined by One-way ANOVA multiple comparisons test.  $p < 0.05$  was considered significant. Results are from the 59 subjects in the initial cohort before vaccination. From two subjects in the increased titer and from one in the decreased subgroups we were unable to establish the precise time of diagnostic.

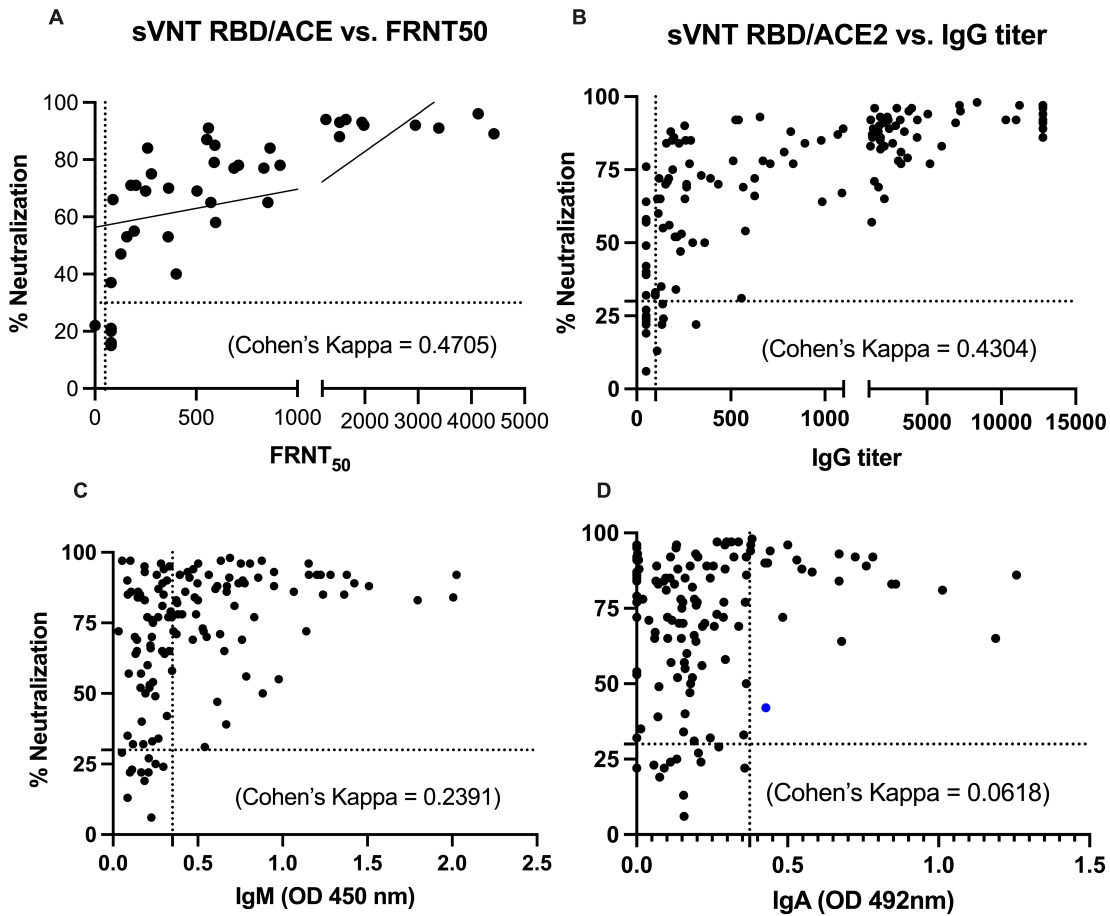

Supplementary figure 3

**Supplementary Figure S3: IgG titers—but not IgM or IgA—correlate with neutralization.** Panel A shows moderate agreement between the sVNT and Focus Reduction Neutralization Tests (FRNT) using the whole virus. Panel B also shows the correlation between the neutralization capacity measured with the surrogate viral neutralization test (sVNT) and the total IgG titers, confirming a moderate agreement. Panels C and D show a fair and a slight agreement between the neutralization activity and the IgM and IgA titers, respectively. All samples (n=131) from the 59 subjects in the initial cohort, before vaccination, were included in the analysis for figures in panels A, C and D. A subset of 41 samples with prior known FRNT results, were used for the correlation analysis showed in panel B. Cohen's Kappa agreement follow Landis and Koch scale. The values ( $\kappa$ ) were considered as follows: poor agreement,  $\kappa < 0.2$ ; fair agreement,  $\kappa = 0.21$  to  $0.4$ ; moderate agreement,  $\kappa = 0.41$  to  $0.6$ ; substantial agreement,  $\kappa = 0.61$  to  $0.8$ ; very good agreement,  $\kappa = 0.81$  to  $1.0$ .

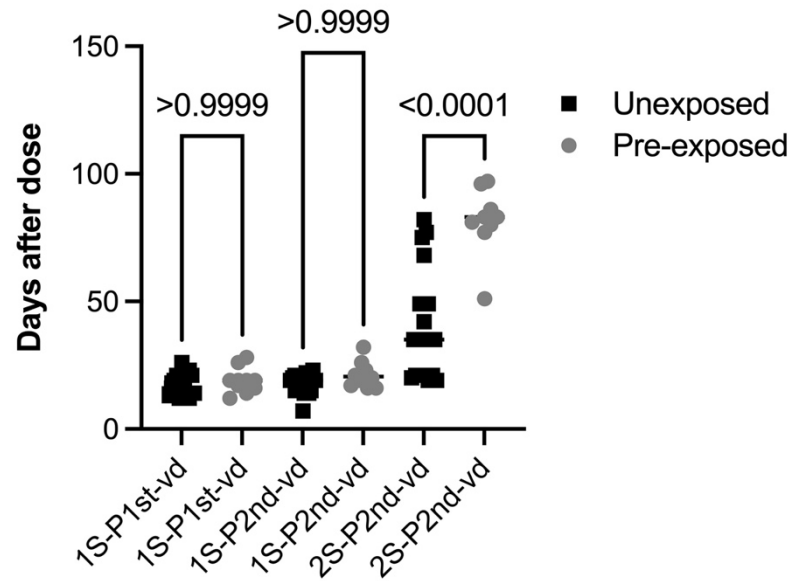

### Supplementary figure S4

**Supplementary Figure S4: Time elapsed between sample collection after vaccination.** The time between the first and second samples after the 1<sup>st</sup> or the 2<sup>nd</sup> vaccine dose (1S-P1st-vd, 1S-P2st-vd) were similar in both groups (pre-exposed and unexposed vaccinated subgroups). However, the time of collection of the third sample (2S-P2nd-vd) was significantly longer for the pre-exposed group compared with the unexposed group. Statistical significance was determined by One-way ANOVA multiple comparisons test and unpaired T test to test for increase or decrease among samples.  $p < 0.05$  was considered significant. Unexposed and vaccinated group  $n=21$ . Pre-exposed and vaccinated group  $n=10$ .

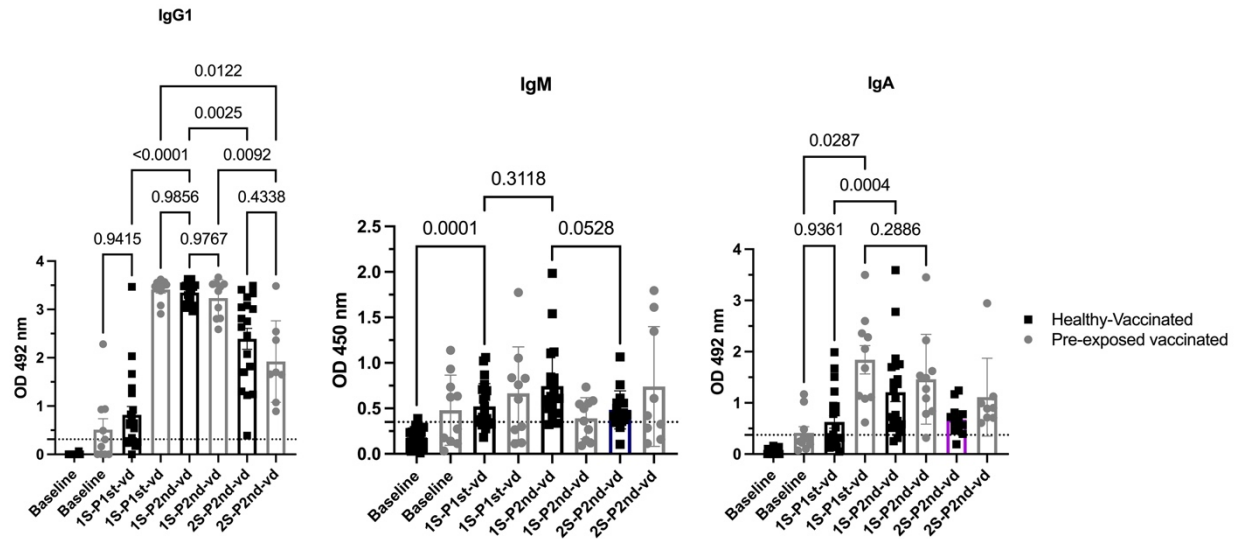

**Supplementary figure 5**

**Supplementary Figure S5: IgG1, IgM and IgA are differentially boosted by the vaccination in healthy or pre-exposed vaccinated subgroups.** The boost of the IgG1 in both subgroups agrees with the total antibodies' changes showed in figure 3 after each vaccine dose. First vaccine dose induces a significant increase in the IgM values only in the unexposed healthy subjects. The first vaccine dose significantly boosted the IgA values in both groups. The increase in IgA titers was significantly higher in the pre-exposed vaccinated group compared to the healthy-vaccinated group. The second vaccine boost resulted in an additional significant increase in IgA titers only in the healthy-vaccinated group suggesting an advantage of the second shot in naïve individuals. Time between the first and second samples after the 1<sup>st</sup> or the 2<sup>nd</sup> vaccine dose (1S-P1st-vd, 1S-P2nd-vd) in pre-exposed and unexposed vaccinated subgroups. Statistical significance was determined by One-way ANOVA multiple comparisons test and unpaired T test to test for increase or decrease among samples.  $p < 0.05$  was considered significant.



| HEALTHY ECONOMY QUARTERS |                   |          |                                                 |                                                 |                                                      |                                                      |                                         |
|--------------------------|-------------------|----------|-------------------------------------------------|-------------------------------------------------|------------------------------------------------------|------------------------------------------------------|-----------------------------------------|
| ID                       | Employee          | Samples  | Time Between First Dose and 1st Sample Post 2nd | Time Between First Dose and 2nd Sample Post 2nd | Time Between Second Dose and 1st Sample Post 2nd Vac | Time Between Second Dose and 2nd Sample Post 2nd Vac | Time Between First Dose and Last Sample |
| 479.1                    | Baseline          | 13/24/20 |                                                 |                                                 |                                                      |                                                      |                                         |
| 479.2                    | First Sample P21  | 4/13/21  |                                                 |                                                 |                                                      |                                                      |                                         |
| 479.3                    | Second Dose       | 5/20/21  | 26                                              | 76                                              | 16                                                   | 40                                                   | 137                                     |
| 479.4                    | First Sample P21  | 5/20/21  |                                                 |                                                 |                                                      |                                                      |                                         |
| 479.5                    | Second Sample P21 | 5/21/21  |                                                 |                                                 |                                                      |                                                      |                                         |
| 479.6                    | Baseline          | 6/18/20  |                                                 |                                                 |                                                      |                                                      |                                         |
| 479.7                    | First Dose        | 5/18/20  |                                                 |                                                 |                                                      |                                                      |                                         |
| 479.8                    | Second Dose       | 5/21/21  | 21                                              | 70                                              | 14                                                   | 42                                                   |                                         |
| 479.9                    | First Sample P21  | 5/24/21  |                                                 |                                                 |                                                      |                                                      |                                         |
| 479.10                   | Second Sample P21 | 5/21/21  |                                                 |                                                 |                                                      |                                                      |                                         |
| 479.11                   | Baseline          | 11/11/20 |                                                 |                                                 |                                                      |                                                      |                                         |
| 479.12                   | First Dose        | 12/20/20 |                                                 |                                                 |                                                      |                                                      |                                         |
| 479.13                   | Second Dose       | 1/14/21  |                                                 |                                                 |                                                      |                                                      |                                         |
| 479.14                   | First Sample P21  | 1/14/21  |                                                 |                                                 |                                                      |                                                      |                                         |
| 479.15                   | Second Sample P21 | 1/20/21  |                                                 |                                                 |                                                      |                                                      |                                         |
| 479.16                   | Baseline          | 1/20/21  |                                                 |                                                 |                                                      |                                                      |                                         |
| 479.17                   | First Dose        | 1/20/21  |                                                 |                                                 |                                                      |                                                      |                                         |
| 479.18                   | Second Dose       | 1/20/21  |                                                 |                                                 |                                                      |                                                      |                                         |
| 479.19                   | First Sample P21  | 1/20/21  |                                                 |                                                 |                                                      |                                                      |                                         |
| 479.20                   | Second Sample P21 | 1/20/21  |                                                 |                                                 |                                                      |                                                      |                                         |
| 479.21                   | Baseline          | 1/20/21  |                                                 |                                                 |                                                      |                                                      |                                         |
| 479.22                   | First Dose        | 1/20/21  |                                                 |                                                 |                                                      |                                                      |                                         |
| 479.23                   | Second Dose       | 1/20/21  |                                                 |                                                 |                                                      |                                                      |                                         |
| 479.24                   | First Sample P21  | 1/20/21  |                                                 |                                                 |                                                      |                                                      |                                         |
| 479.25                   | Second Sample P21 | 1/20/21  |                                                 |                                                 |                                                      |                                                      |                                         |
| 479.26                   | Baseline          | 1/20/21  |                                                 |                                                 |                                                      |                                                      |                                         |
| 479.27                   | First Dose        | 1/20/21  |                                                 |                                                 |                                                      |                                                      |                                         |
| 479.28                   | Second Dose       | 1/20/21  |                                                 |                                                 |                                                      |                                                      |                                         |
| 479.29                   | First Sample P21  | 1/20/21  |                                                 |                                                 |                                                      |                                                      |                                         |
| 479.30                   | Second Sample P21 | 1/20/21  |                                                 |                                                 |                                                      |                                                      |                                         |
| 479.31                   | Baseline          | 1/20/21  |                                                 |                                                 |                                                      |                                                      |                                         |
| 479.32                   | First Dose        | 1/20/21  |                                                 |                                                 |                                                      |                                                      |                                         |
| 479.33                   | Second Dose       | 1/20/21  |                                                 |                                                 |                                                      |                                                      |                                         |
| 479.34                   | First Sample P21  | 1/20/21  |                                                 |                                                 |                                                      |                                                      |                                         |
| 479.35                   | Second Sample P21 | 1/20/21  |                                                 |                                                 |                                                      |                                                      |                                         |
| 479.36                   | Baseline          | 1/20/21  |                                                 |                                                 |                                                      |                                                      |                                         |
| 479.37                   | First Dose        | 1/20/21  |                                                 |                                                 |                                                      |                                                      |                                         |
| 479.38                   | Second Dose       | 1/20/21  |                                                 |                                                 |                                                      |                                                      |                                         |
| 479.39                   | First Sample P21  | 1/20/21  |                                                 |                                                 |                                                      |                                                      |                                         |
| 479.40                   | Second Sample P21 | 1/20/21  |                                                 |                                                 |                                                      |                                                      |                                         |
| 479.41                   | Baseline          | 1/20/21  |                                                 |                                                 |                                                      |                                                      |                                         |
| 479.42                   | First Dose        | 1/20/21  |                                                 |                                                 |                                                      |                                                      |                                         |
| 479.43                   | Second Dose       | 1/20/21  |                                                 |                                                 |                                                      |                                                      |                                         |
| 479.44                   | First Sample P21  | 1/20/21  |                                                 |                                                 |                                                      |                                                      |                                         |
| 479.45                   | Second Sample P21 | 1/20/21  |                                                 |                                                 |                                                      |                                                      |                                         |
| 479.46                   | Baseline          | 1/20/21  |                                                 |                                                 |                                                      |                                                      |                                         |
| 479.47                   | First Dose        | 1/20/21  |                                                 |                                                 |                                                      |                                                      |                                         |
| 479.48                   | Second Dose       | 1/20/21  |                                                 |                                                 |                                                      |                                                      |                                         |
| 479.49                   | First Sample P21  | 1/20/21  |                                                 |                                                 |                                                      |                                                      |                                         |
| 479.50                   | Second Sample P21 | 1/20/21  |                                                 |                                                 |                                                      |                                                      |                                         |
| 479.51                   | Baseline          | 1/20/21  |                                                 |                                                 |                                                      |                                                      |                                         |
| 479.52                   | First Dose        | 1/20/21  |                                                 |                                                 |                                                      |                                                      |                                         |
| 479.53                   | Second Dose       | 1/20/21  |                                                 |                                                 |                                                      |                                                      |                                         |
| 479.54                   | First Sample P21  | 1/20/21  |                                                 |                                                 |                                                      |                                                      |                                         |
| 479.55                   | Second Sample P21 | 1/20/21  |                                                 |                                                 |                                                      |                                                      |                                         |
| 479.56                   | Baseline          | 1/20/21  |                                                 |                                                 |                                                      |                                                      |                                         |
| 479.57                   | First Dose        | 1/20/21  |                                                 |                                                 |                                                      |                                                      |                                         |
| 479.58                   | Second Dose       | 1/20/21  |                                                 |                                                 |                                                      |                                                      |                                         |
| 479.59                   | First Sample P21  | 1/20/21  |                                                 |                                                 |                                                      |                                                      |                                         |
| 479.60                   | Second Sample P21 | 1/20/21  |                                                 |                                                 |                                                      |                                                      |                                         |
| 479.61                   | Baseline          | 1/20/21  |                                                 |                                                 |                                                      |                                                      |                                         |
| 479.62                   | First Dose        | 1/20/21  |                                                 |                                                 |                                                      |                                                      |                                         |
| 479.63                   | Second Dose       | 1/20/21  |                                                 |                                                 |                                                      |                                                      |                                         |
| 479.64                   | First Sample P21  | 1/20/21  |                                                 |                                                 |                                                      |                                                      |                                         |
| 479.65                   | Second Sample P21 | 1/20/21  |                                                 |                                                 |                                                      |                                                      |                                         |
| 479.66                   | Baseline          | 1/20/21  |                                                 |                                                 |                                                      |                                                      |                                         |
| 479.67                   | First Dose        | 1/20/21  |                                                 |                                                 |                                                      |                                                      |                                         |
| 479.68                   | Second Dose       | 1/20/21  |                                                 |                                                 |                                                      |                                                      |                                         |
| 479.69                   | First Sample P21  | 1/20/21  |                                                 |                                                 |                                                      |                                                      |                                         |
| 479.70                   | Second Sample P21 | 1/20/21  |                                                 |                                                 |                                                      |                                                      |                                         |
| 479.71                   | Baseline          | 1/20/21  |                                                 |                                                 |                                                      |                                                      |                                         |
| 479.72                   | First Dose        | 1/20/21  |                                                 |                                                 |                                                      |                                                      |                                         |
| 479.73                   | Second Dose       | 1/20/21  |                                                 |                                                 |                                                      |                                                      |                                         |
| 479.74                   | First Sample P21  | 1/20/21  |                                                 |                                                 |                                                      |                                                      |                                         |
| 479.75                   | Second Sample P21 | 1/20/21  |                                                 |                                                 |                                                      |                                                      |                                         |
| 479.76                   | Baseline          | 1/20/21  |                                                 |                                                 |                                                      |                                                      |                                         |
| 479.77                   | First Dose        | 1/20/21  |                                                 |                                                 |                                                      |                                                      |                                         |
| 479.78                   | Second Dose       | 1/20/21  |                                                 |                                                 |                                                      |                                                      |                                         |
| 479.79                   | First Sample P21  | 1/20/21  |                                                 |                                                 |                                                      |                                                      |                                         |
| 479.80                   | Second Sample P21 | 1/20/21  |                                                 |                                                 |                                                      |                                                      |                                         |
| 479.81                   | Baseline          | 1/20/21  |                                                 |                                                 |                                                      |                                                      |                                         |
| 479.82                   | First Dose        | 1/20/21  |                                                 |                                                 |                                                      |                                                      |                                         |
| 479.83                   | Second Dose       | 1/20/21  |                                                 |                                                 |                                                      |                                                      |                                         |
| 479.84                   | First Sample P21  | 1/20/21  |                                                 |                                                 |                                                      |                                                      |                                         |
| 479.85                   | Second Sample P21 | 1/20/21  |                                                 |                                                 |                                                      |                                                      |                                         |
| 479.86                   | Baseline          | 1/20/21  |                                                 |                                                 |                                                      |                                                      |                                         |
| 479.87                   | First Dose        | 1/20/21  |                                                 |                                                 |                                                      |                                                      |                                         |
| 479.88                   | Second Dose       | 1/20/21  |                                                 |                                                 |                                                      |                                                      |                                         |
| 479.89                   | First Sample P21  | 1/20/21  |                                                 |                                                 |                                                      |                                                      |                                         |
| 479.90                   | Second Sample P21 | 1/20/21  |                                                 |                                                 |                                                      |                                                      |                                         |
| 479.91                   | Baseline          | 1/20/21  |                                                 |                                                 |                                                      |                                                      |                                         |
| 479.92                   | First Dose        | 1/20/21  |                                                 |                                                 |                                                      |                                                      |                                         |
| 479.93                   | Second Dose       | 1/20/21  |                                                 |                                                 |                                                      |                                                      |                                         |
| 479.94                   | First Sample P21  | 1/20/21  |                                                 |                                                 |                                                      |                                                      |                                         |
| 479.95                   | Second Sample P21 | 1/20/21  |                                                 |                                                 |                                                      |                                                      |                                         |
| 479.96                   | Baseline          | 1/20/21  |                                                 |                                                 |                                                      |                                                      |                                         |
| 479.97                   | First Dose        | 1/20/21  |                                                 |                                                 |                                                      |                                                      |                                         |
| 479.98                   | Second Dose       | 1/20/21  |                                                 |                                                 |                                                      |                                                      |                                         |
| 479.99                   | First Sample P21  | 1/20/21  |                                                 |                                                 |                                                      |                                                      |                                         |
| 479.100                  | Second Sample P21 | 1/20/21  |                                                 |                                                 |                                                      |                                                      |                                         |
| 479.101                  | Baseline          | 1/20/21  |                                                 |                                                 |                                                      |                                                      |                                         |
| 479.102                  | First Dose        | 1/20/21  |                                                 |                                                 |                                                      |                                                      |                                         |
| 479.103                  | Second Dose       | 1/20/21  |                                                 |                                                 |                                                      |                                                      |                                         |
| 479.104                  | First Sample P21  | 1/20/21  |                                                 |                                                 |                                                      |                                                      |                                         |
| 479.105                  | Second Sample P21 | 1/20/21  |                                                 |                                                 |                                                      |                                                      |                                         |
| 479.106                  | Baseline          | 1/20/21  |                                                 |                                                 |                                                      |                                                      |                                         |
| 479.107                  | First Dose        | 1/20/21  |                                                 |                                                 |                                                      |                                                      |                                         |
| 479.108                  | Second Dose       | 1/20/21  |                                                 |                                                 |                                                      |                                                      |                                         |
| 479.109                  | First Sample P21  | 1/20/21  |                                                 |                                                 |                                                      |                                                      |                                         |
| 479.110                  | Second Sample P21 | 1/20/21  |                                                 |                                                 |                                                      |                                                      |                                         |
| 479.111                  | Baseline          | 1/20/21  |                                                 |                                                 |                                                      |                                                      |                                         |
| 479.112                  | First Dose        | 1/20/21  |                                                 |                                                 |                                                      |                                                      |                                         |
| 479.113                  | Second Dose       | 1/20/21  |                                                 |                                                 |                                                      |                                                      |                                         |
| 479.114                  | First Sample P21  | 1/20/21  |                                                 |                                                 |                                                      |                                                      |                                         |
| 479.115                  | Second Sample P21 | 1/20/21  |                                                 |                                                 |                                                      |                                                      |                                         |
| 479.116                  | Baseline          | 1/20/21  |                                                 |                                                 |                                                      |                                                      |                                         |
| 479.117                  | First Dose        | 1/20/21  |                                                 |                                                 |                                                      |                                                      |                                         |
| 479.118                  | Second Dose       | 1/20/21  |                                                 |                                                 |                                                      |                                                      |                                         |
| 479.119                  | First Sample P21  | 1/20/21  |                                                 |                                                 |                                                      |                                                      |                                         |
| 479.120                  | Second Sample P21 | 1/20/21  |                                                 |                                                 |                                                      |                                                      |                                         |
| 479.121                  | Baseline          | 1/20/21  |                                                 |                                                 |                                                      |                                                      |                                         |
| 479.122                  | First Dose        | 1/20/21  |                                                 |                                                 |                                                      |                                                      |                                         |
| 479.123                  | Second Dose       | 1/20/21  |                                                 |                                                 |                                                      |                                                      |                                         |
| 479.124                  | First Sample P21  | 1/20/21  |                                                 |                                                 |                                                      |                                                      |                                         |
| 479.125                  | Second Sample P21 | 1/20/21  |                                                 |                                                 |                                                      |                                                      |                                         |
| 479.126                  | Baseline          | 1/20/21  |                                                 |                                                 |                                                      |                                                      |                                         |
| 479.127                  | First Dose        | 1/20/21  |                                                 |                                                 |                                                      |                                                      |                                         |
| 479.128                  | Second Dose       | 1/20/21  |                                                 |                                                 |                                                      |                                                      |                                         |
| 479.129                  | First Sample P21  | 1/20/21  |                                                 |                                                 |                                                      |                                                      |                                         |
| 479.130                  | Second Sample P21 | 1/20/21  |                                                 |                                                 |                                                      |                                                      |                                         |
| 479.131                  | Baseline          | 1/20/21  |                                                 |                                                 |                                                      |                                                      |                                         |
| 479.132                  | First Dose        | 1/20/21  |                                                 |                                                 |                                                      |                                                      |                                         |
| 479.133                  | Second Dose       | 1/20/21  |                                                 |                                                 |                                                      |                                                      |                                         |
| 479.134                  | First Sample P21  | 1/20/21  |                                                 |                                                 |                                                      |                                                      |                                         |
| 479.135                  | Second Sample P21 | 1/20/21  |                                                 |                                                 |                                                      |                                                      |                                         |
| 479.136                  | Baseline          | 1/20/21  |                                                 |                                                 |                                                      |                                                      |                                         |
| 479.137                  | First Dose        | 1/20/21  |                                                 |                                                 |                                                      |                                                      |                                         |
| 479.138                  | Second Dose       | 1/20/21  |                                                 |                                                 |                                                      |                                                      |                                         |
| 479.139                  | First Sample P21  | 1/20/21  |                                                 |                                                 |                                                      |                                                      |                                         |
| 479.140                  | Second Sample P21 | 1/20/21  |                                                 |                                                 |                                                      |                                                      |                                         |
| 479.141                  | Baseline          | 1/20/21  |                                                 |                                                 |                                                      |                                                      |                                         |
| 479.142                  | First Dose        | 1/20/21  |                                                 |                                                 |                                                      |                                                      |                                         |
| 479.143                  | Second Dose       | 1/20/21  |                                                 |                                                 |                                                      |                                                      |                                         |
| 479.144                  | First Sample P21  | 1/20/21  |                                                 |                                                 |                                                      |                                                      |                                         |
| 479.145                  | Second Sample P21 | 1/20/21  |                                                 |                                                 |                                                      |                                                      |                                         |
| 479.146                  | Baseline          | 1/20/21  |                                                 |                                                 |                                                      |                                                      |                                         |
| 479.147                  | First Dose        | 1/20/21  |                                                 |                                                 |                                                      |                                                      |                                         |
| 479.148                  | Second Dose       | 1/20/21  |                                                 |                                                 |                                                      |                                                      |                                         |
| 479.149                  | First Sample P21  | 1/20/21  |                                                 |                                                 |                                                      |                                                      |                                         |
| 479.150                  | Second Sample P21 | 1/20/21  |                                                 |                                                 |                                                      |                                                      |                                         |
| 479.151                  | Baseline          | 1/20/21  |                                                 |                                                 |                                                      |                                                      |                                         |
| 479.152                  | First Dose        | 1/20/21  |                                                 |                                                 |                                                      |                                                      |                                         |
| 479.153                  | Second Dose       | 1/20/21  |                                                 |                                                 |                                                      |                                                      |                                         |
| 479.154                  | First Sample P21  | 1/20/21  |                                                 |                                                 |                                                      |                                                      |                                         |
| 479.155                  | Second Sample P21 | 1/20/21  |                                                 |                                                 |                                                      |                                                      |                                         |
| 479.156                  | Baseline          | 1/20/21  |                                                 |                                                 |                                                      |                                                      |                                         |
| 479.157                  | First Dose        | 1/20/21  |                                                 |                                                 |                                                      |                                                      |                                         |
| 479.158                  | Second Dose       | 1/20/21  |                                                 |                                                 |                                                      |                                                      |                                         |
| 479.159                  | First Sample P21  | 1/20/21  |                                                 |                                                 |                                                      |                                                      |                                         |
| 479.160                  | Second Sample P21 | 1/20/21  |                                                 |                                                 |                                                      |                                                      |                                         |
| 479.161                  | Baseline          | 1/20/21  |                                                 |                                                 |                                                      |                                                      |                                         |
| 479.162                  | First Dose        | 1/20/21  |                                                 |                                                 |                                                      |                                                      |                                         |
| 479.163                  | Second Dose       | 1/20/21  |                                                 |                                                 |                                                      |                                                      |                                         |
| 479.164                  | First Sample P21  | 1/20/21  |                                                 |                                                 |                                                      |                                                      |                                         |
| 479.165                  | Second Sample P21 | 1/20/21  |                                                 |                                                 |                                                      |                                                      |                                         |
| 479.166                  | Baseline          | 1/20/21  |                                                 |                                                 |                                                      |                                                      |                                         |
| 479.167                  | First Dose        | 1/20/21  |                                                 |                                                 |                                                      |                                                      |                                         |
| 479.168                  | Second Dose       | 1/20/21  |                                                 |                                                 |                                                      |                                                      |                                         |
| 479.169                  | First Sample P21  | 1/20/21  |                                                 |                                                 |                                                      |                                                      |                                         |
| 479.170                  | Second Sample P21 | 1/20/21  |                                                 |                                                 |                                                      |                                                      |                                         |
| 479.171                  | Baseline          | 1/20/21  |                                                 |                                                 |                                                      |                                                      |                                         |
| 479.172                  | First Dose        | 1/20/21  |                                                 |                                                 |                                                      |                                                      |                                         |
| 479.173                  | Second Dose       | 1/20/21  |                                                 |                                                 |                                                      |                                                      |                                         |
| 479.174                  | First Sample P21  | 1/20/21  |                                                 |                                                 |                                                      |                                                      |                                         |
| 479.175                  | Second Sample P21 | 1/20/21  |                                                 |                                                 |                                                      |                                                      |                                         |
| 479.176                  | Baseline          | 1/20/21  |                                                 |                                                 |                                                      |                                                      |                                         |
| 479.177                  | First Dose        | 1/20/21  |                                                 |                                                 |                                                      |                                                      |                                         |
| 479.178                  | Second Dose       | 1/20/21  |                                                 |                                                 |                                                      |                                                      |                                         |
| 479.179                  | First Sample P21  | 1/20/21  |                                                 |                                                 |                                                      |                                                      |                                         |
| 479.180                  | Second Sample P21 | 1/20/21  |                                                 |                                                 |                                                      |                                                      |                                         |
| 479.181                  | Baseline          | 1/20/21  |                                                 |                                                 |                                                      |                                                      |                                         |
| 479.182                  | First Dose        | 1/20/21  |                                                 |                                                 |                                                      |                                                      |                                         |
| 479.183                  | Second Dose       | 1/20/21  |                                                 |                                                 |                                                      |                                                      |                                         |
| 479.184                  | First Sample P21  | 1/20/21  |                                                 |                                                 |                                                      |                                                      |                                         |
| 479.185                  | Second Sample P21 | 1/20/21  |                                                 |                                                 |                                                      |                                                      |                                         |
| 479.186                  | Baseline          | 1/20/21  |                                                 |                                                 |                                                      |                                                      |                                         |
| 479.187                  | First Dose        | 1/20/21  |                                                 |                                                 |                                                      |                                                      |                                         |
| 479.188                  | Second Dose       | 1/20/21  |                                                 |                                                 |                                                      |                                                      |                                         |
| 479.189                  | First Sample P21  | 1/20/21  |                                                 |                                                 |                                                      |                                                      |                                         |
| 479.190                  | Second Sample P21 | 1/20/21  |                                                 |                                                 |                                                      |                                                      |                                         |
| 479.191                  | Baseline          | 1/20/21  |                                                 |                                                 |                                                      |                                                      |                                         |
| 479.192                  | First Dose        | 1/20/21  |                                                 |                                                 |                                                      |                                                      |                                         |
| 479.193                  | Second Dose       | 1/20/21  |                                                 |                                                 |                                                      |                                                      |                                         |
| 479.194                  | First Sample P21  | 1/20/21  |                                                 |                                                 |                                                      |                                                      |                                         |
| 479.195                  | Second Sample P21 | 1/20/21  |                                                 |                                                 |                                                      |                                                      |                                         |
| 479.196                  | Baseline          | 1/20/21  |                                                 |                                                 |                                                      |                                                      |                                         |
| 479.197                  | First Dose        | 1/20/21  |                                                 |                                                 |                                                      |                                                      |                                         |
| 479.198                  | Second Dose       | 1/20/21  |                                                 |                                                 |                                                      |                                                      |                                         |
| 479.199                  | First Sample P21  | 1/20/21  |                                                 |                                                 |                                                      |                                                      |                                         |
| 479.200                  | Second Sample P21 | 1/20/21  |                                                 |                                                 |                                                      |                                                      |                                         |
| 479.201                  | Baseline          | 1/20/21  |                                                 |                                                 |                                                      |                                                      |                                         |
| 479.202                  | First Dose        | 1/20/21  |                                                 |                                                 |                                                      |                                                      |                                         |
| 479.203                  | Second Dose       | 1/20/21  |                                                 |                                                 |                                                      |                                                      |                                         |
| 479.204                  | First Sample P21  | 1/20/21  |                                                 |                                                 |                                                      |                                                      |                                         |
| 479.205                  | Second Sample P21 | 1/20/21  |                                                 |                                                 |                                                      |                                                      |                                         |
| 479.206                  | Baseline          | 1/20/21  |                                                 |                                                 |                                                      |                                                      |                                         |
| 479.207                  | First Dose        | 1/20/21  |                                                 |                                                 |                                                      |                                                      |                                         |
| 479.208                  | Second Dose       | 1/20/21  |                                                 |                                                 |                                                      |                                                      |                                         |
| 479.209                  | First Sample P21  | 1/20/21  |                                                 |                                                 |                                                      |                                                      |                                         |
| 479.210                  | Second Sample P21 | 1/20/21  |                                                 |                                                 |                                                      |                                                      |                                         |
| 479.211                  | Baseline          | 1/20/21  |                                                 |                                                 |                                                      |                                                      |                                         |
| 479.212                  | First Dose        | 1/20/21  |                                                 |                                                 |                                                      |                                                      |                                         |
| 479.213                  | Second Dose       | 1/20/21  |                                                 |                                                 |                                                      |                                                      |                                         |
| 479.214                  | First Sample P21  | 1/20/21  |                                                 |                                                 |                                                      |                                                      |                                         |
| 479.215                  | Second Sample P21 | 1/20/21  |                                                 |                                                 |                                                      |                                                      |                                         |
| 479.216                  | Baseline          | 1/20/21  |                                                 |                                                 |                                                      |                                                      |                                         |
| 479.217                  | First Dose        | 1/20/21  |                                                 |                                                 |                                                      |                                                      |                                         |
| 479.218                  | Second Dose       | 1/20/21  |                                                 |                                                 |                                                      |                                                      |                                         |
| 479.219                  | First Sample P21  | 1/20/21  |                                                 |                                                 |                                                      |                                                      |                                         |

| ID      | DX       | First dose vaccine | Time (days) between Dx and first vaccine dose | Months |
|---------|----------|--------------------|-----------------------------------------------|--------|
| 384     | 9/8/20   | 12/28/20           | 111                                           | 3.7    |
| 367.7   | 10/10/20 | 1/8/21             | 90                                            | 3.0    |
| 218     | 10/14/20 | 1/7/21             | 85                                            | 2.8    |
| 376     | 7/30/20  | 1/22/21            | 176                                           | 5.9    |
| 313     | 8/10/20  | 1/26/21            | 169                                           | 5.6    |
| 382     | 8/28/20  | 1/23/21            | 148                                           | 4.9    |
| 511     | 11/23/20 | 1/29/21            | 67                                            | 2.2    |
| 512     | 11/23/20 | 1/29/21            | 67                                            | 2.2    |
| 294     | 7/13/20  | 1/30/21            | 201                                           | 6.7    |
| 297     | 3/15/20  | 2/3/21             | 310                                           | 10.3   |
| Average |          |                    | 142.4                                         | 4.7    |



| n=59 | Summary results from 59 serial samples |             |         |               |           |          |          |             |            |            | Surrogate Vint<br>≥30% |
|------|----------------------------------------|-------------|---------|---------------|-----------|----------|----------|-------------|------------|------------|------------------------|
|      | Numeric ID                             | Sample Date | OD mean | Est IgG titer | IgG1>242+ | IgG2>186 | IgG3>48+ | IgG4>0.251+ | IgA>0.374+ | IgM>0.350+ |                        |
| 1    | 105                                    | 4/30/20     | 2.4548  | 3483          | 3.7       | 0.108    | 1.315    | 0.150       | 0.008      | 0.949      | 88                     |
|      | 105.2                                  | 5/2/20      | 1.331   | >12800        | 0.182     | 0.066    | 0.437    | -0.044      | 0.232      | 0.740      | 89                     |
|      | 105.3                                  | 7/10/20     | 1.818   | 1097          | 0.365     | 0.042    | 0.228    | -0.037      | 0.254      | 0.498      | 89                     |
|      | 105.4                                  | 10/8/20     | 1.4     | 513           | 0.088     | 0.075    | 0.286    | 0.103       | 0.191      | 0.407      | 78                     |
|      | 112                                    | 4/27/20     | 2.1755  | 2094          | 3.01      | 0.005    | 0.170    | 0.095       | 0.530      | 0.856      | 91                     |
| 2    | 112.2                                  | 8/4/20      | 2.5     | 3776          | 0.424     | 0.014    | -0.015   | 0.493       | 0.130      | 0.186      | 95                     |
|      | 113                                    | 4/27/20     | 1.0806  | 287           | 0.01      | 0.037    | 0.060    | 0.036       | 0.110      | 1.363      | 85                     |
|      | 113.2                                  | 8/12/20     | 2.075   | 1746          | -0.085    | 0.071    | -0.073   | -0.224      | 0.257      | 0.761      | 69                     |
|      | 148                                    | 5/11/20     | 2.249   | 2398          | 0.684     | 0.133    | 0.320    | 0.004       | 0.364      | 0.565      | 92                     |
|      | 148.2                                  | 8/5/20      | 2.37    | 2985          | 0.37      | 0.055    | 0.255    | -0.035      | 0.560      | 0.562      | 96                     |
| 5    | 137                                    | 4/30/20     | 1.037   | 265           | 0.12      | -0.018   | 0.040    | 0.006       | 0.225      | 0.552      | 70                     |
|      | 137.2                                  | 6/2/20      | 2.417   | 3251          | 0.083     | 0.003    | -0.016   | -0.034      | -0.098     | 0.716      | 81                     |
|      | 137.3                                  | 7/6/20      | 2.895   | 6934          | 0.62      | 0.128    | 0.029    | 0.006       | 0.006      | 0.685      | 91                     |
|      | 195                                    | 5/21/20     | 3.329   | >12800        | 1.067     | -0.007   | 0.255    | 1.336       | 0.132      | 0.807      | 96                     |
|      | 195.2                                  | 7/10/20     | 1.983   | 1479          | 0.702     | 0.026    | 0.073    | 0.163       | -0.005     | 0.282      | 96                     |
| 6    | 195.3                                  | 8/4/20      | 3.145   | >12800        | 1.008     | 0.1208   | -0.028   | -0.059      | 0.292      | 1.154      | 96                     |
|      | 231                                    | 6/9/20      | 2.33    | 2897          | 0.513     | 0.034    | 0.150    | 0.072       | 0.425      | 0.765      | 90                     |
|      | 231.2                                  | 7/13/20     | 2.676   | 5200          | 0.178     | 0.024    | 0.031    | 0.055       | 0.153      | 0.346      | 77                     |
|      | 209                                    | 5/26/20     | 2.474   | 3698          | 0.297     | 0.005    | 0.062    | 0.043       | -0.008     | 0.339      | 79                     |
|      | 209.2                                  | 7/13/20     | 1.761   | 986           | 0.116     | 0.111    | -0.027   | -0.028      | 0.196      | 0.303      | 64                     |
| 9    | 209.3                                  | 8/31/20     | 0.5446  | 109           | -0.127    | 0.035    | -0.015   | -0.063      | 0.103      | 0.311      | 65                     |
|      | 183                                    | 5/13/20     | 1.711   | 893           | 0.43      | -0.025   | 0.070    | 0.030       | 0.670      | 2.006      | 84                     |
|      | 183.2                                  | 7/15/20     | 2.185   | 2133          | 0.119     | 0.148    | 0.052    | 0.199       | 0.845      | 1.797      | 83                     |
|      | 163                                    | 5/11/20     | 1.437   | 627           | 0.575     | -0.055   | 0.090    | 0.230       | 0.190      | 0.222      | 66                     |
|      | 163.2                                  | 7/17/20     | 0.921   | 215           | 0.069     | 0.020    | 0.038    | 0.418       | 0.185      | 0.214      | 52                     |
| 11   | 199                                    | 5/21/20     | 1.464   | 577           | 0.086     | 0.037    | 0.023    | -0.073      | -0.124     | 0.235      | 54                     |
|      | 199.2                                  | 7/18/20     | 1.816   | 1051          | 0.079     | 0.023    | 0.038    | -0.008      | 0.061      | 0.220      | 67                     |
|      | 210                                    | 5/28/20     | 3.053   | 10304         | 0.732     | 0.180    | 0.033    | 0.024       | -0.044     | 1.202      | 92                     |
|      | 210.2                                  | 7/20/20     | 2.86    | 720           | 0.095     | 0.009    | 0.086    | -0.086      | 0.332      | 0.95       | 82                     |
|      | 229                                    | 8/5/20      | 2.103   | 1866          | 0.380     | 0.216    | 0.125    | 0.000       | -0.082     | 0.159      | 85                     |
| 14   | 229.2                                  | 7/20/20     | 2.115   | 1875          | 0.248     | 0.064    | 0.041    | -0.023      | -0.175     | 0.106      | 86                     |
|      | 166                                    | 5/11/20     | 1.783   | 1028          | 0.175     | -0.045   | 0.142    | 0.114       | 0.160      | 0.977      | 55                     |
|      | 166.2                                  | 7/21/20     | 0.964   | 232           | 0.036     | -0.032   | 0.035    | -0.012      | 0.176      | 0.615      | 47                     |
|      | 156                                    | 5/11/20     | 1.759   | 832           | 0.515     | 0.2295   | 0.060    | 0.120       | 0.200      | 0.325      | 77                     |
|      | 156.2                                  | 7/22/20     | 1.307   | 433           | 0.174     | 0.056    | 0.032    | 0.123       | 0.154      | 0.129      | 70                     |
| 16   | 156.3                                  | 9/24/20     | 0.224   | n/a           | 0.206     | 0.113    | 0.013    | 0.125       | 0.158      | 0.093      | 57                     |
|      | 170                                    | 5/11/20     | 1.160   | 1280          | 1.11      | 0.106    | 0.175    | 0.315       | 0.760      | 1.423      | 89                     |
|      | 170.2                                  | 7/23/20     | 3.088   | 10990         | 0.694     | 0.158    | 0.134    | 0.616       | 0.782      | 0.258      | 92                     |
|      | 207                                    | 5/28/20     | 2.576   | 4335          | 0.389     | 0.0509   | 0.129    | -0.049      | -0.123     | 0.148      | 86                     |
|      | 207.2                                  | 7/19/20     | 1.872   | 1208          | 0.137     | 0.125    | 0.065    | 0.290       | 0.071      | 0.187      | 83                     |
| 18   | 185                                    | 5/11/20     | 1.43    | 541           | 0.576     | 0.216    | 0.007    | 0.034       | 0.150      | 2.026      | 92                     |
|      | 185.2                                  | 7/24/20     | 1.948   | 1387          | 0.275     | 0.103    | 0.051    | 0.126       | 0.066      | 0.776      | 89                     |
|      | 185.3                                  | 9/11/20     | 0.8741  | 197           | -0.096    | 0.082    | -0.026   | 0.084       | -0.093     | 0.426      | 86                     |
|      | 302                                    | 5/11/20     | 0.325   | <100          | -0.0289   | 0.074    | 0.003    | -0.078      | -0.090     | 0.209      | 22                     |
|      | 302.2                                  | 7/14/20     | 0.191   | n/a           | 0.07504   | 0.052    | 0.074    | 0.019       | 0.157      | 0.225      | 6                      |
| 20   | 203                                    | 5/21/20     | 1.579   | 710           | 0.1351    | 0.060    | 0.064    | -0.068      | -0.106     | 0.202      | 77                     |
|      | 203.2                                  | 7/24/20     | 2.188   | 2143          | 0.11187   | 0.092    | 0.053    | 0.078       | 0.148      | 0.141      | 65                     |
|      | 180                                    | 5/11/20     | 2.052   | 1675          | 0.05      | -0.051   | 0.041    | 0.015       | 0.020      | 0.383      | 78                     |
|      | 180.2                                  | 7/25/20     | 1.905   | 1622          | 0.031     | 0.048    | 0.018    | 0.089       | 0.114      | 0.165      | 57                     |
|      | 179                                    | 5/11/20     | 1.265   | 401           | 0.01      | -0.056   | 0.079    | 0.090       | 0.040      | 0.374      | 71                     |
| 22   | 179.2                                  | 8/7/20      | 0.856   | 191           | 0.023     | 0.039    | 0.016    | -0.024      | 0.150      | 0.235      | 75                     |
|      | 179.3                                  | 9/25/20     | 0.299   | n/a           | 0.042     | 0.069    | 0.014    | 0.095       | 0.197      | 0.229      | 76                     |
|      | 162                                    | 5/11/20     | 2.122   | 2704          | 0.48      | -0.038   | 0.320    | 0.085       | 0.090      | 0.481      | 84                     |
|      | 162.2                                  | 7/28/20     | 1.979   | 1466          | 0.083     | 0.101    | 0.047    | -0.186      | 0.117      | 0.631      | 71                     |
|      | 201                                    | 5/21/20     | 0.544   | 108           | 0.054     | 0.047    | 0.080    | -0.089      | 0.155      | 0.085      | 13                     |
| 24   | 201.2                                  | 7/29/20     | 0.643   | 130           | -0.077    | 0.009    | 0.048    | -0.010      | 0.014      | 0.085      | 35                     |
|      | 225                                    | 5/16/20     | 3.034   | >12800        | 1.177     | 0.074    | 0.045    | 0.353       | 0.314      | 0.102      | 97                     |
|      | 275.2                                  | 8/8/20      | 3.099   | 11220         | 1.016     | 0.048    | 0.079    | 0.184       | 0.266      | 0.053      | 97                     |
|      | 171                                    | 5/11/20     | 2.477   | 3251          | 0.41      | -0.034   | 0.185    | 0.300       | 0.360      | 0.833      | 77                     |
|      | 171.2                                  | 8/14/20     | 2.385   | 3069          | -0.08     | 0.033    | 0.099    | -0.042      | 0.146      | 0.489      | 78                     |
| 27   | 181                                    | 5/11/20     | 1.715   | 256           | 0.06      | -0.036   | 0.055    | 0.060       | 0.656      | 0.65       | 65                     |
|      | 181.2                                  | 8/25/20     | 0.37    | <100          | -0.156    | 0.093    | -0.074   | 0.025       | 0.074      | 0.249      | 49                     |
|      | 214                                    | 5/28/20     | 3.483   | >12800        | 2.695     | 0.112    | 2.710    | -0.006      | 1.258      | 1.066      | 86                     |
|      | 214.2                                  | 8/27/20     | 2.117   | 1884          | 0.427     | 0.046    | 0.772    | -0.034      | 0.185      | 0.378      | 82                     |
|      | 176                                    | 5/11/20     | 2.512   | 2313          | 0.45      | -0.041   | 0.550    | 0.028       | 0.670      | 0.949      | 89                     |
| 30   | 176.2                                  | 9/5/20      | 0.851   | 189           | 0.142     | 0.093    | 0.157    | 0.012       | 0.244      | 0.087      | 85                     |
|      | 318                                    | 8/19/20     | 3.205   | >12800        | 1.631     | 0.050    | 0.189    | -0.079      | 0.322      | 1.283      | 92                     |
|      | 318.2                                  | 9/18/20     | 2.112   | 1869          | 1.197     | 0.077    | 0.063    | -0.049      | 0.003      | 0.439      | 91                     |
|      | 322                                    | 8/24/20     | 3.219   | >12800        | 2.09      | 0.469    | 0.312    | 0.024       | 0.442      | 0.473      | 94                     |
|      | 322.2                                  | 9/19/20     | 2.267   | 2473          | 0.869     | 0.619    | 0.137    | -0.074      | 0.177      | 0.291      | 89                     |
| 32   | 393                                    | 9/2/20      | 0.624   | 125           | 0.05565   | -0.002   | 0.040    | -0.077      | 1.189      | 0.289      | 65                     |
|      | 393.2                                  | 9/22/20     | 0.425   | <100          | 0.04785   | 0.165    | 0.027    | -0.082      | 0.679      | 0.123      | 64                     |
|      | 276                                    | 7/16/20     | 0.804   | 208           | 0.00334   | 0.071    | 0.025    | 0.350       | 0.155      | 0.288      | 34                     |
|      | 276.2                                  | 9/23/20     | 0.076   | n/a           | 0.05869   | 0.111    | 0.018    | 0.398       | 0.133      | 0.251      | 25                     |
|      | 403                                    | 9/10/20     | 1.658   | 819           | 0.292     | 0.022    | 0.035    | 0.734       | 0.547      | 1.509      | 88                     |
| 34   | 403.2                                  | 9/25/20     | 1.757   | 980           | 0.444     | 0.146    | 0.078    | 0.109       | 0.160      | 1.238      | 85                     |
|      | 284                                    | 7/21/20     | 3.205   | >12800        | 0.835     | -0.013   | 1.447    | -0.065      | 0.071      | 0.451      | 91                     |
|      | 284.2                                  | 9/26/20     | 1.027   | 260           | 0.376     | 0.039    | 0.037    | -0.050      | 0.096      | 0.298      | 85                     |
|      | 391                                    | 9/1/20      | 2.409   | 3202          | 1.499     | -0.010   | 0.124    | -0.067      | 0.112      | 0.394      | 92                     |
|      | 391.2                                  | 9/29/20     | 1.921   | 1319          | 0.729     | 0.001    | 0.043    | -0.080      | -0.029     | 0.168      | 87                     |
| 37   | 397                                    | 9/4/20      | 0.791   | 120           | -0.016    | 0.079    | 0.086    | -0.073      | 0.095      | 0.386      | 72                     |
|      | 397.2                                  | 10/3/20     | 0.575   | 115           | 0.084     | 0.083    | 0.027    | -0.052      | 0.166      | 0.203      | 60                     |
|      | 390                                    | 8/31/20     | 1.876   | 1217          | 0.503     | 0.018    | 0.587    | 0.128       | 0.363      | 1.378      | 92                     |
|      | 390.2                                  | 10/9/20     | 1.413   | 525           | 0.365     | 0.068    | 0.333    | 0.134       | 0.203      | 1.224      | 92                     |
|      | 410                                    | 9/12/20     | 0.947   | 225           | 0.228     | -0.028   | 0.021    | -0.056      | 0.064      | 0.182      | 84                     |
| 39   | 410.2                                  | 10/5/20     | 0.752   | 158           | 0.3137    | -0.086   | 0.032    | -0.055      | -0.014     | 0.145      | 84                     |
|      | 417                                    | 9/16/20     | 1.179   | 343           | 0.283     | 0.028    | 0.508    | 0.092       | 0.265      | 0.529      | 73                     |
|      | 417.2                                  | 10/6/20     | 1.069   | 281           | 0.235     | 0.190    | 0.250    | -0.029      | 0.289      | 0.266      | 77                     |
|      | 261                                    | 6/22/20     | 3.185   | >12800        | 2.652     | -0.098   | 0.125    | 0.006       | 0.337      | 0.877      | 97                     |
|      | 261.2                                  | 6/29/20     | 2.528   | 3981          | 2.490     | 0.085    | 1.791    | -0.002      | 0.378      | 0.753      | 96                     |
| 42   | 265                                    | 4/22/20     | 0.209   | n/a           | 0.095     | 0.030    | 0.117    | 0.036       | 0.428      | 0.317      | 42                     |
|      | 265.2                                  | 6/29/20     | 2.075   | 1738          | 1.089     | 0.058    | 0.381    | -0.025      | 0.293      | 0.672      | 88                     |
|      | 192                                    | 5/12/20     | 0.977   | 218           | 0.032     | -0.047   | 0.057    | -0.066      | 0.040      | 0.216      | 53                     |
|      | 192.2                                  | 8/4/20      | 0.410   | <100          | 0.169     | -0.025   | 0.018    | 0.122       | -0.099     | 0.178      | 32                     |
|      | 192.3                                  | 12/9/20     | 0.162   | n/a           | 0.053     | 0.060    | 0.056    | -0.192      | 0.160      | 0.169      | 40                     |
| 44   | 376                                    | 9/10/20     | 2.660   | 5058          | 0.646     | -0.016   | 0.031    | 0.054       | 0.377      | 0.299      | 94                     |
|      | 376.2                                  | 12/18/20    | 0.389   | 118           | 0.002     | 0.034    | 0.061    | 0.018       | 0.02       | 0.032      | 72                     |
|      | 300                                    | 8/7/20      | 0.802   | 173           | -0.006    | 0.123    | 0.006    | 0.119       | 0.216      | 0.786      | 56                     |
|      | 300.2                                  | 9/14/20     | 1.101   | 298           | -0.129    | 0.062    | -0.040   | -0.035      | 0.363      | 0.882      | 50                     |
|      | 300.3                                  | 9/5/21      | 0.441   | n/a           | 0.223     | 0.325    | 0.019    | 0.012       | 0.213      | 0.89       | 24                     |
| 46   | 312                                    | 8/17/20     | 0.745   | 998           | 0.486     | 0.056    | 0.121    | 0.038       | 0.858      | 0.500      | 83                     |
|      | 312.2                                  | 8/13/20     | 1.465   | 566           | 0.468     | 0.056    | 0.177    | 0.036       | 0.218      | 0.67       | 68                     |
|      | 312.3                                  | 12/21/20    | 0.351   | <100          | 0.053     | 0.025    | 0.017    | -0.188      | 0.294      | 0.348      | 58                     |
|      | 367                                    | 11/2/20     | 2.578   | 4351          | 1.514     | 0.090    | 0.509    | 3.0895      | 0.724      | 1.155      | 92                     |
|      | 367.2                                  | 12/18/20    | 2.155   | 2018          | 0.686     | 0.115995 | 0.078    | 0.712       | 0.125      | 0.673      |                        |

| Previous Natural Infected Vaccinated Volunteers |                    |                    |         |                  |            |            |            |           |         |
|-------------------------------------------------|--------------------|--------------------|---------|------------------|------------|------------|------------|-----------|---------|
| Numeric ID                                      | Timepoint          | Date               | OD mean | CoVlgG Est titer | sVNT > 30% | IgG1>.242+ | IgA>0.374+ | IgM>0.350 | Vaccine |
| 384.2                                           | Sample Baseline    | 12/16/20           | 1.037   | 265              | 69         | 0.162      | 0.338      | 0.141     | Pfizer  |
| 384.3                                           | Sample First Dose  | 1/13/21            | 2.806   | 6586             | 98         | 3.476      | 3.497      | 0.302     |         |
| 384.4                                           | 23 d post 2nd dose | 2/10/21            | 2.848   | 7114             | 98         | 3.524      | 3.453      | 0.148     |         |
| 384.5                                           | 51 d post 2nd dose | 3/10/2021 (71 dpv) | 2.2202  | 2273             | 97         | 1.650      | 2.944      | 0.160     |         |
| 367.2                                           | Sample Baseline    | 12/18/20           | 2.155   | 2018             | 83         | 0.928      | 0.221      | 0.273     | Pfizer  |
| 367.3                                           | Sample First Dose  | 1/22/2021 (14 dpv) | 3.164   | 12617            | 98         | 3.570      | 2.282      | 0.112     |         |
| 367.4                                           | 20 d post 2nd dose | 2/25/2021 (48dpv)  | 2.4670  | 3558             | 97         | 3.522      | 1.623      | 0.268     |         |
| 367.5                                           | 96 d post 2nd dose | 5/12/21 (124 dpv)  | 2.0004  | 1525             | 97         | 1.698      | 0.903      | 0.609     |         |
| 218                                             | Sample Baseline    | 11/2/20            | 1.253   | 392              | 72         | -0.087     | 0.484      | 1.139     | Pfizer  |
| 218.3                                           | Sample First Dose  | 2/4/2021 (28dpv)   | 2.794   | 6444             | 98         | 3.489      | 1.110      | 0.601     |         |
| 218.4                                           | 20 d post 2nd dose | 2/25/2021 (49dpv)  | 2.5759  | 4336             | 97         | 3.536      | 1.488      | 0.361     |         |
| 218.5                                           | 96 d post 2nd dose | 5/12/21 (124 dpv)  | 1.9884  | 1492             | 97         | 2.540      | 0.608      | 0.419     |         |
| 376.2                                           | Sample Baseline    | 12/18/20           | 0.589   | 118              | 72         | 0.002      | 0.102      | 0.032     | Moderna |
| 376.3                                           | Sample First Dose  | 2/10/2021 (19dpv)  | 2.693   | 5366             | 98         | 3.513      | 2.359      | 0.265     |         |
| 376.4                                           | 18 d post 2nd dose | 3/12/2021 (49dpv)  | 2.3341  | 2795             | 97         | 3.377      | 2.223      | 0.120     |         |
| 376.5                                           | 74 d post 2nd dose | 5/7/21 (105 dpv)   | 2.1959  | 2174             | 96         | 2.366      | 0.714      | 0.284     |         |
| 313.3                                           | Sample Baseline    | 1/12/21            | 2.854   | 7191             | 97         | 2.281      | 0.298      | 0.635     | Pfizer  |
| 313.4                                           | Sample First Dose  | 2/12/2021 (17dpv)  | 2.443   | 3408             | 99         | 3.554      | 0.617      | 0.122     |         |
| 313.5                                           | 16 d post 2nd dose | 3/4/2021 (37dpv)   | 2.7405  | 5847             | 97         | 3.466      | 0.840      | 0.090     |         |
| 313.6                                           | 77 d post 2nd dose | 5/4/2021 (98 dpv)  | 2.4636  | 3536             | 98         | 3.485      | 0.888      | 0.327     |         |
| 382.3                                           | Sample Baseline    | 1/14/21            | 0.194   | n/a              | 39         | -0.025     | 0.070      | 0.624     | Pfizer  |
| 382.4                                           | Sample First Dose  | 2/4/21 (12dpv)     | 2.8173  | 6722             | 98         | 3.524      | 2.056      | 0.759     |         |
| 382.5                                           | 19 d post 2nd dose | 3/4/2021 (40dpv)   | 2.5915  | 4461             | 97         | 3.037      | 1.273      | 0.499     |         |
| 382.6                                           | 83 d post 2nd dose | 5/7/21 (104 dpv)   | 1.7845  | 1030             | 96         | 0.893      | 0.707      | 1.611     |         |
| 511                                             | Sample Baseline    | 1/27/21            | 1.6438  | 798              | 81         | 0.490      | 1.170      | 0.932     | Pfizer  |
| 511.2                                           | Sample First Dose  | 2/17/2021 (19dpv)  | 2.636   | 4836             | 98         | 3.384      | 1.678      | 0.836     |         |
| 511.3                                           | 25 d post 2nd dose | 3/17/2021 (47 dpv) | 2.6989  | 5421             | 97         | 2.589      | 1.089      | 0.558     |         |
| 511.4                                           | 83 d post 2nd dose | 5/13/21 (104 dpv)  | 1.6635  | 827              | 96         | 1.076      | 1.125      | 1.347     |         |
| 512                                             | Sample Baseline    | 1/27/21            | 0.5396  | 107              | 46         | 0.004      | 0.192      | 0.734     | Pfizer  |
| 512.2                                           | Sample First Dose  | 2/17/2021 (19dpv)  | 2.596   | 4498             | 98         | 2.909      | 2.599      | 1.773     |         |
| 512.3                                           | 25 d post 2nd dose | 3/17/2021 (47dpv)  | 2.6937  | 5370             | 89         | 2.815      | 1.530      | 0.735     |         |
| 512.4                                           | 83 d post 2nd dose | 5/13/21 (104 dpv)  | 1.8261  | 1111             | 96         | 1.660      | 0.993      | 1.795     |         |
| 294.2                                           | Sample Baseline    | 12/11/21           | 1.535   | 6550             | 90         | 0.309      | 0.249      | 0.176     | Moderna |
| 294.3                                           | Sample First Dose  | 2/25/2021 (26 dpv) | 1.9255  | 1331             | 97         | 3.621      | 1.080      | 1.053     |         |
| 294.4                                           | Sample Second Dose | 3/31/2021 (60dpv)  | 2.3998  | 3150             | 98         | 2.806      | 0.318      | 0.546     |         |
| 297                                             | Sample Baseline    | 8/7/20             | 2.932   | 8279             | 96         | 0.937      | 1.024      | 0.114     | Moderna |
| 297.2                                           | Sample First Dose  | 2/22/2021 (19dpv)  | 2.9251  | 8176             | 97         | 3.081      | 1.139      | 0.831     |         |
| 297.3                                           | Sample Second Dose | 3/20/2021 (45dpv)  | 2.5652  | 4253             | 97         | 3.665      | 0.784      | 0.585     |         |

#### Cutoff values

CoVlgG endpoint limit of detection = 100-12800

CoVlgG cutoff >.5 Positive

Cut-off Borderline IgG = 0.312-.49

Cut-off IgG1= 0.242

Cut-off IgG3= 0.48

Cut-off IgG4= 0.251

Cut-off IgA= 0.374

Cut-off IgM= 0.350

Cut-off IgM Borderline= 0.229 - 0.349

| Healthy Vaccinated Volunteers |                     |                     |         |                  |          |           |            |           |         |
|-------------------------------|---------------------|---------------------|---------|------------------|----------|-----------|------------|-----------|---------|
| Numeric ID                    | Timepoint           | Date                | OD mean | CoVlgG Est titer | sVNT>30% | IgG1>242+ | IgA>0.374+ | IgM>0.350 | Vaccine |
| 479                           | Sample Baseline     | 12/28/20            | 0.049   | n/a              | 10       | -0.098    | -0.119     | 0.282     | Moderna |
| 479.2                         | Sample First Dose   | 1/19/2021 (26dpv)   | 2.1150  | 1878             | 46       | 0.917     | 0.317      | 0.389     |         |
| 479.3                         | 16 d post 2nd dose  | 2/5/2021 (41dpv)    | 3.0060  | 9470             | 97       | 3.477     | 1.399      | 0.337     |         |
| 479.4                         | 49 d post 2nd dose  | 3/10/2021 (75 dpv)  | 2.0446  | 1653             | 97       | 2.076     | 0.618      | 0.759     |         |
| 479.5                         | 110 d post 2nd dose | 5/10/21 (137 dpv)   | 1.9715  | 1447             | 93       | 0.790     | 0.614      | 1.142     |         |
| 112                           | Sample Baseline     | 4/28/20             | 0.0663  | n/a              | 19       | -0.114    | 0.022      | 0.292     | Moderna |
| 112.2                         | Sample First Dose   | 1/20/2021 (21 dpv)  | 2.9999  | 9365             | 96       | 3.468     | 0.820      | 0.763     |         |
| 112.3                         | 14 d post 2nd dose  | 2/10/2021 (42 dpv)  | 2.721   | 5640             | 98       | 3.626     | 1.102      | 0.633     |         |
| 112.4                         | 45 d post 2nd dose  | 3/10/2021 (69dpv)   | 2.3291  | 2770             | 97       | 3.492     |            | 0.375     |         |
| 2                             | Sample Baseline     | 12/21/20            | 0.008   | n/a              | 10       | -0.168    | 0.160      | 0.137     |         |
| 2.2                           | Sample First Dose   | 1/12/2021 (13 dpv)  | 1.328   | 449              | 46       | 0.173     | 0.936      | 0.342     | Pfizer  |
| 2.3                           | 15 d post 2nd dose  | 2/4/2021 (36 dpv)   | 2.6808  | 5246             | 98       | 3.149     | 1.280      | 1.541     |         |
| 2.4                           | 34 d post 2nd dose  | 2/24/2021 (56 dpv)  | 2.5260  | 3961             | 97       | 3.080     | 0.568      | 0.590     |         |
| 2.5                           | 92 d post 2nd dose  | 4/22/2021 (113 dpv) | 2.3787  | 3031             | 96       | 1.070     | 0.432      | 0.263     |         |
| 3                             | Sample Baseline     | 12/21/20            | 0.007   | n/a              | 19       | 0.064     | 0.098      | 0.315     |         |
| 3.2                           | Sample First Dose   | 1/12/2021 (13 dpv)  | 2.024   | 1592             | 49       | 1.372     | 1.221      | 0.403     | Pfizer  |
| 3.3                           | 15 d post 2nd dose  | 2/4/2021 (36 dpv)   | 2.6703  | 5147             | 98       | 3.233     | 1.726      | 0.675     |         |
| 3.4                           | 34 d post 2nd dose  | 2/24/2021 (56 dpv)  | 2.2177  | 2263             | 97       | 3.046     | 1.167      | 0.344     |         |
| 3.5                           | 92 d post 2nd dose  | 4/22/2021 (113 dpv) | 2.0937  | 1807             | 97       | 1.043     | 1.412      | 0.517     |         |
| 243                           | Sample Baseline     | 7/14/20             | 0.110   | n/a              | 22       | -0.072    | -0.021     | 0.201     |         |
| 243.2                         | Sample First Dose   | 1/14/2021 (15dpv)   | 2.144   | 1981             | 76       | 1.265     | 0.942      | 0.327     | Pfizer  |
| 243.3                         | 15 d post 2nd dose  | 2/4/2021 (36 dpv)   | 2.7023  | 5456             | 97       | 3.074     | 1.866      | 0.611     |         |
| 243.4                         | 35 d post 2nd dose  | 2/24/2021 (57 dpv)  | 2.4217  | 3278             | 97       | 3.009     | 0.726      | 0.415     |         |
| 258                           | Sample Baseline     | 1/4/21              | -0.004  | n/a              | 20       | -0.376    | 0.039      | 0.062     |         |
| 258.2                         | Sample First Dose   | 1/22/2021 (18 dpv)  | 2.0730  | 1740             | 50       | 0.539     | 0.125      | 0.346     |         |
| 258.3                         | 22 d post 2nd dose  | 2/16/21 (43 dpv)    | 2.868   | 7375             | 97       | 3.409     | 0.510      | 0.539     | Pfizer  |
| 258.4                         | 49 d post 2nd dose  | 3/15/2021 (70 dpv)  | 2.2390  | 2352             | 96       | 1.702     |            | 0.501     |         |
| 258.5                         | 113 d post 2nd dose | 5/18/21 (134 dpv)   | 1.7816  | 1025             |          |           |            |           |         |
| 119                           | Sample Baseline     | 1/4/21              | 0.023   | n/a              | 21       | -0.312    | 0.034      | 0.240     |         |
| 119.2                         | Sample First Dose   | 1/22/2021 (18 dpv)  | 0.8700  | 196              | 29       | 0.254     | 0.052      | 0.330     |         |
| 119.3                         | 18 d post 2nd dose  | 2/12/2021 (39 dpv)  | 2.7140  | 5573             | 97       | 3.546     | 0.535      | 0.447     | Pfizer  |
| 119.4                         | 49 d post 2nd dose  | 3/15/2021 (70 dpv)  | 2.0232  | 1589             | 93       | 1.242     |            |           |         |
| 119.5                         | 115 s post 2nd dose | 5/20/21             | 1.7546  | 976              |          |           |            |           |         |
| 190                           | Sample Baseline     | 5/19/20             | 0.135   | n/a              | 23       | -0.124    | -0.116     | 0.105     |         |
| 190.2                         | Sample First Dose   | 1/21/2021 (12 dpv)  | 0.6352  | 126              | 28       | -0.012    | 0.138      | 0.182     | Pfizer  |
| 190.3                         | 21 d post 2nd dose  | 2/22/2021 (45 dpv)  | 2.5927  | 4471             | 97       | 3.112     | 0.316      | 0.322     |         |
| 190.4                         | 82 d post 2nd dose  | 4/22/2021 (103 dpv) | 1.7373  | 929              | 95       |           |            |           |         |
| 453                           | Sample Baseline     | 1/11/21             | -0.003  | n/a              | 12       | -0.095    | -0.112     | 0.053     |         |
| 453.2                         | Sample First Dose   | 2/3/2021 (23 dpv)   | 1.808   | 1076             | 76       | 0.649     | 0.139      | 0.525     |         |
| 453.3                         | 19 d post 2nd dose  | 2/22/2021 (43 dpv)  | 2.672   | 5163             | 97       | 3.028     | 0.251      | 0.496     | Pfizer  |
| 453.4                         | 77 d post 2nd dose  | 4/21/2021 (100 dpv) | 1.276   | 409              | 86       |           |            |           |         |
| 6                             | Sample Baseline     | 1/13/21             | -0.001  | n/a              | 15       | -0.110    | 0.139      | 0.133     |         |
| 6.2                           | Sample First Dose   | 1/28/2021 (16 dpv)  | 1.301   | 455              | 65       | 0.276     | 0.156      | 0.317     |         |
| 6.3                           | 14 d post 2nd dose  | 2/16/21 (34 dpv)    | 2.758   | 6039             | 98       | 3.424     | 0.942      | 0.540     |         |
| 6.4                           | 21 d post 2nd dose  | 2/23/2021 (42dpv)   | 2.538   | 4051             | 96       | 3.090     | 0.649      | 0.384     | Pfizer  |
| 6.5                           | 61 d post 2nd dose  | 4/21/2021 (99 dpv)  | 1.838   | 1137             | 90       | 0.389     | 0.459      | 0.105     |         |
| 383                           | Sample Baseline     | 1/13/21             | -0.010  | n/a              | 4        | -0.124    | -0.024     | 0.235     |         |
| 383.2                         | Sample First Dose   | 2/5/2021 (23 dpv)   | 2.412   | 3217             | 71       | 2.031     | 0.284      | 1.022     |         |
| 383.3                         | 17 d post 2nd dose  | 2/22/2021 (40 dpv)  | 2.433   | 3346             | 98       | 3.082     | 0.433      | 0.787     |         |
| 383.4                         | 75 d post 2nd dose  | 4/21/2021 (98 dpv)  | 1.751   | 970              | 95       |           |            |           | Pfizer  |
| 450                           | Sample Baseline     | 1/13/21             | -0.005  | n/a              | 4        | -0.071    | -0.079     | 0.067     |         |
| 450.2                         | Sample First Dose   | 2/3/2021 (21 dpv)   | 1.791   | 1043             | 70       | 0.651     | 0.282      | 0.695     |         |
| 450.3                         | 19 d post 2nd dose  | 2/22/2021 (40 dpv)  | 2.600   | 4531             | 95       | 2.960     | 0.592      | 1.101     |         |
| 450.4                         | 35 d post 2nd dose  | 3/10/2021 (56dpv)   | 2.1228  | 1905             | 89       | 1.226     |            | 0.613     |         |
| 450.5                         | 96 d post 2nd dose  | 5/10/21 (117 dpv)   | 1.4567  | 568              | 46       | 0.330     | 0.504      | 0.596     | Pfizer  |
| 110                           | Sample Baseline     | 1/13/21             | 0.006   | n/a              | 18       | -0.137    | 0.085      | 0.030     |         |
| 110.2                         | Sample First Dose   | 2/3/2021 (23 dpv)   | 1.564   | 691              | 44       | 0.278     | 0.383      | 0.275     |         |
| 110.3                         | 19 d post 2nd dose  | 2/22/2021 (40 dpv)  | 2.519   | 3909             | 97       | 3.298     | 0.725      | 0.608     |         |
| 110.4                         | 35 d post 2nd dose  | 3/10/2021 (56dpv)   | 2.1813  | 2118             | 95       | 1.304     |            | 0.358     |         |
| 110.5                         | 96 d post 2nd dose  | 5/10/21 (117 dpv)   | 1.9259  | 1332             | 70       | 0.478     | 0.557      | 0.322     |         |
| 480                           | Sample Baseline     | 1/13/21             | -0.004  | n/a              | 29       | -0.002    | -0.110     | 0.113     | Pfizer  |
| 480.2                         | Sample First Dose   | 2/3/2021 (21 dpv)   | 1.826   | 1111             | 60       | 0.827     | 0.313      | 0.460     |         |
| 480.3                         | 19 d post 2nd dose  | 2/22/2021 (40 dpv)  | 2.618   | 4685             | 97       | 3.500     | 0.765      | 0.561     |         |
| 480.4                         | 35 d post 2nd dose  | 3/10/2021 (56dpv)   | 2.2003  | 2193             | 96       | 2.634     |            | 0.437     |         |
| 480.5                         | 96 d post 2nd dose  | 5/10/21 (117 dpv)   | 2.0802  | 1763             | 93       | 1.2325    | 0.417      | 0.490     |         |
| 10                            | Sample Baseline     | 1/19/21             | 0.0094  | n/a              | 24       | -0.059    | 0.100      | 0.389     | Pfizer  |
| 10.2                          | Sample First Dose   | 2/4/21 (14 dpv)     | 1.5188  | 636              | 61       | 0.624     | 1.509      | 0.868     |         |
| 10.3                          | 7 d post 2nd dose   | 2/18/21 (28 dpv)    | 2.7957  | 6464             | 97       | 3.562     | 2.780      | 0.779     |         |
| 10.4                          | 21 d post 2nd dose  | 3/4/2021 (42dpv)    | 2.5257  | 3959             | 96       | 1.817     | 0.779      | 0.452     |         |
| 10.5                          | 60 d post 2nd dose  | 4/12/2021 (81 dpv)  | 1.8359  | 1131             | 92       | 0.307     | 0.547      | 0.451     |         |
| 116                           | Sample Baseline     | 12/21/20            | 0.057   | n/a              | 0        | -0.011    | 0.033      | 0.133     | Pfizer  |
| 116.2                         | Sample First Dose   | 2/4/21 (14 dpv)     | 1.727   | 928              | 66       | 0.607     | 0.273      | 0.633     |         |
| 116.3                         | 7 d post 2nd dose   | 2/18/21 (28 dpv)    | 3.049   | 10239            | 97       | 3.494     | 0.583      | 1.984     |         |
| 116.4                         | 21 d post 2nd dose  | 3/4/2021 (42dpv)    | 2.6355  | 4832             | 97       | 3.255     | 0.190      | 1.065     |         |
| 116.5                         | 60 d post 2nd dose  | 4/12/2021 (101dpv)  | 2.3693  | 2980             | 97       | 1.784     | 0.250      | 0.334     |         |
| 380                           | Sample Baseline     | 12/21/20            | 0.049   | n/a              | 25       | -0.098    | -0.040     | 0.229     | Pfizer  |
| 380.2                         | Sample First Dose   | 2/4/21 (14 dpv)     | 1.1782  | 343              | 61       | 0.240     | 0.330      | 0.601     |         |
| 380.3                         | 7 d post 2nd dose   | 2/18/21 (28 dpv)    | 2.787   | 6362             | 97       | 3.559     | 1.699      | 0.835     |         |
| 380.4                         | 21 d post 2nd dose  | 3/4/2021 (42dpv)    | 2.4966  | 3755             | 96       | 2.811     | 0.655      | 0.428     |         |
| 380.5                         | 60 d post 2nd dose  | 4/12/2021 (81 dpv)  | 2.2685  | 2482             | 97       | 1.328     | 0.825      | 0.235     |         |
| 8                             | Sample Baseline     | 1/20/21             | 0.007   | n/a              | 26       | -0.066    | 0.078      | 0.258     | Pfizer  |
| 8.2                           | Sample First Dose   | 2/4/21 (14 dpv)     | 0.998   | 247              | 70       | 0.340     | 1.672      | 0.376     |         |
| 8.3                           | 7 d post 2nd dose   | 2/18/21 (28 dpv)    | 2.665   | 5101             | 97       | 3.375     | 1.463      | 0.427     |         |
| 8.4                           | 20 d post 2nd dose  | 3/3/2021 (41dpv)    | 2.6953  | 5387             | 96       | 2.460     | 0.477      | 0.291     |         |
| 8.5                           | 63 d post 2nd dose  | 4/14/2021 (83 dpv)  | 1.8998  | 1270             | 95       | 0.498     | 0.222      | 0.452     |         |
| 117                           | Sample Baseline     | 8/10/20             | 0.082   | n/a              | 22       | -0.020    | 0.096      | 0.237     | Pfizer  |
| 117.2                         | Sample First Dose   | 2/4/21 (12 dpv)     | 0.949   | 226              | 55       | 0.236     | 0.520      | 0.348     |         |
| 117.3                         | 6 d post 2nd dose   | 2/19/21 (27 dpv)    | 2.510   | 3848             | 97       | 3.631     | 1.755      | 1.120     |         |
| 117.4                         | 19 d post 2nd dose  | 3/4/2021 (40dpv)    | 2.6655  | 5102             | 97       | 3.409     | 0.811      | 0.559     |         |
| 117.5                         | 58 d post 2nd dose  | 4/12/2021 (79 dpv)  | 2.3352  | 2801             | 97       | 1.827     | 0.291      | 0.482     |         |
| 254                           | Sample Baseline     | 1/13/21             | 0.009   | n/a              | 18       | -0.099    | 0.002      | 0.160     | Pfizer  |
| 254.2                         | Sample First Dose   | 2/4/21 (12 dpv)     | 1.525   | 643              | 57       | 0.761     | 0.786      | 0.707     |         |
| 254.3                         | 10 d post 2nd dose  | 2/23/2021 (33 dpv)  | 2.629   | 5101             | 98       | 3.631     | 1.369      | 0.845     |         |
| 254.4                         | 19 d post 2nd dose  | 3/4/2021 (40dpv)    | 2.6047  | 4569             | 96       | 3.331     | 0.396      | 0.377     |         |
| 254.5                         | 58 d post 2nd dose  | 4/12/2021 (79 dpv)  | 2.2378  | 2347             | 97       | 1.3268    | 0.461      | 0.902     |         |
| 513                           | Sample Baseline     | 1/28/21             | 0.038   | n/a              | 17       | -0.072    | 0.072      | 0.011     | Moderna |
| 513.2                         | Sample First Dose   | 2/16/21 (19DPV)     | 2.189   | 2148             | 79       | 1.664     | 1.987      | 1.060     |         |
| 513.3                         | 7 d post 2nd dose   | 3/4/2021 (35dpv)    | 2.7381  | 5821             | 97       | 3.466     | 3.591      | 0.597     |         |
| 513.4                         | 68 d post 2nd dose  | 5/4/2021 (96 dpv)   | 2.3635  | 3239             | 98       | 2.7565    | 1.241      | 0.5576    |         |

**Cutoff values**  
 CoVigG endpoint      limit of detection = 100-12800  
 CoVigG cutoff > .5 Positive  
 Cut-off Borderline IgG = 0.312- .49  
 Cut-off IgG1= 0.242  
 Cut-off IgG3= 0.48  
 Cut-off IgG4= 0.251  
 Cut-off IgA= 0.374  
 Cut-off IgM= 0.350  
 Cut-off IgM Borderline= 0.229 - 0.349
